# Supplementary material
Source: publisher site journal article supplement (https://neobiota.pensoft.net/article/71868/download/suppl/31/)
Supplement: Supplementary file 1

## Ecological and potential socioeconomic impacts of two globally invasive crayfish

Takudzwa C. Madzivanzira<sup>1,2,\*</sup>, Olaf L.F. Weyl<sup>2,3,1</sup> and Josie South<sup>4,3,2,1</sup>

<sup>1</sup> Department of Ichthyology and Fisheries Science, Rhodes University, Makhanda 6140, South Africa

<sup>2</sup> DSI/NRF Research Chair in Inland Fisheries and Freshwater Ecology, South African Institute for Aquatic Biodiversity (SAIAB), Makhanda 6140, South Africa

<sup>3</sup> Centre for Invasion Biology, SAIAB, Makhanda, 6140 South Africa

<sup>4</sup> School of Biology, Faculty of Biological Sciences, University of Leeds, Leeds LS2 9JT, UK

### Supplementary Information 1

#### Supplementary Information 1(a). Macrophyte dry weight determination

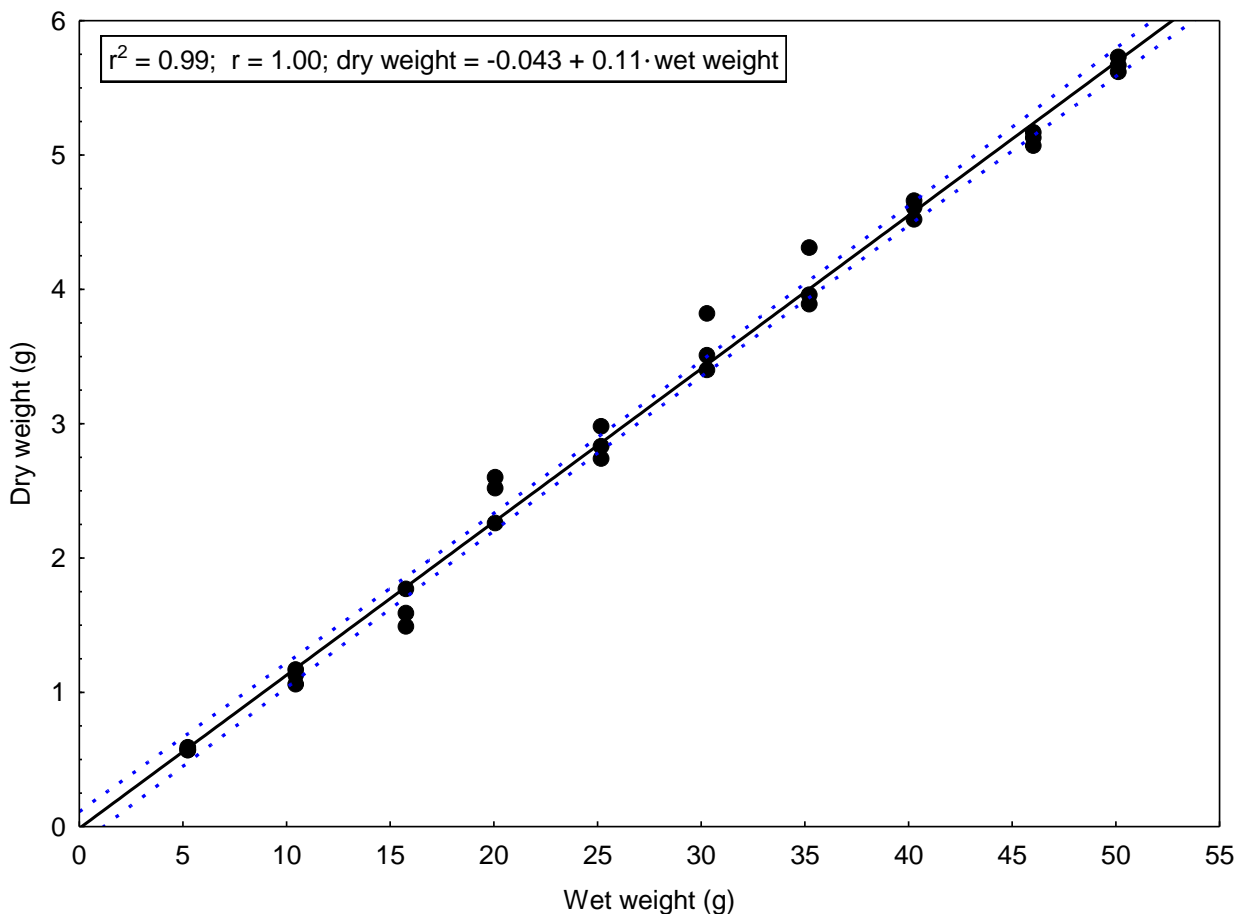

Determination of dry weight from wet weight of the pondweed *Potamogeton nodosus* using linear regression with 95% confidence intervals shown by dashed lines. Individual points indicate raw data points for each wet weight.

**Supplementary Information 1(b). Morphometric averages ( $\pm$  SE) of used animals**

| Species                       | Experiment | CL (mm)          | Mass (g)         |
|-------------------------------|------------|------------------|------------------|
| <i>Cherax quadricarinatus</i> | macrophyte | 60.01 $\pm$ 1.31 | 68.83 $\pm$ 2.82 |
| <i>Procambarus clarkii</i>    | macrophyte | 56.24 $\pm$ 1.14 | 53.28 $\pm$ 1.16 |
| <i>Potamonautes perlatus</i>  | macrophyte | 53.28 $\pm$ 1.16 | 87.72 $\pm$ 4.92 |
| <i>Cherax quadricarinatus</i> | fish       | 63.20 $\pm$ 1.10 | 67.34 $\pm$ 2.52 |
| <i>Procambarus clarkii</i>    | fish       | 58.62 $\pm$ 1.53 | 59.54 $\pm$ 1.58 |
| <i>Potamonautes perlatus</i>  | fish       | 53.27 $\pm$ 1.02 | 96.29 $\pm$ 4.95 |

The CL of the decapods used for the experiments differed significantly ( $F_{(2, 117)} = 16.77$ ,  $P < 0.001$ ), where *P. perlatus* and *P. clarkii* had a mean CL which was significantly lower than *C. quadricarinatus* ( $P < 0.001$ ). With respect to mass, there were significant differences between the three decapods ( $F_{(2, 117)} = 43.47$ ,  $P < 0.001$ ), where *P. perlatus* weighed more than the two crayfish species ( $P < 0.001$ ).
